# Supplementary material for: Synthesis and biological evaluation of novel analogues of batracylin with synthetic amino acids and adenosine: an unexpected effect on centromere segregation in tumor cells through a dual inhibition of topoisomerase IIα and Aurora B
Source: Royal Society of Chemistry journal article supplement (doi:10.1039/c6ra04957e), 2016-01-01
Supplement: c6ra04957e1.pdf [file c6ra04957e1.pdf]

## Supporting Information

### Synthesis and biological evaluation of novel analogues of batracylin with synthetic amino acids and adenosine: an unexpected effect on centromere segregation in tumor cells through a dual inhibition of topoisomerase II $\alpha$ and Aurora B

Wioleta Januchta,<sup>a</sup> Marcin Serocki,<sup>b</sup> Krystyna Dzierzbicka,<sup>\*a</sup> Grzegorz Cholewinski,<sup>a</sup> Monika Gensicka<sup>a</sup> and Andrzej Skladanowski<sup>b</sup>

<sup>a</sup>Department of Organic Chemistry, Chemical Faculty, Gdansk University of Technology, G. Narutowicza 11/12, 80-233 Gdansk, Poland. E-mail: krydzier@pg.gda.pl

<sup>b</sup>Department of Pharmaceutical Technology and Biochemistry, Faculty of Chemistry, Gdansk University of Technology, 11/12 G. Narutowicza St, 80-233 Gdansk, Poland

## Experimental part

### Chemistry

Determination of the structure of selected analogues **3d** and **3h** by <sup>1</sup>H NMR (500 MHz) and <sup>13</sup>C NMR. Assigned carbon atom numbering sequence in the structures obtained analogues (Fig. 1 and 2) for which a description is given of <sup>1</sup>H NMR and <sup>13</sup>C NMR spectra.

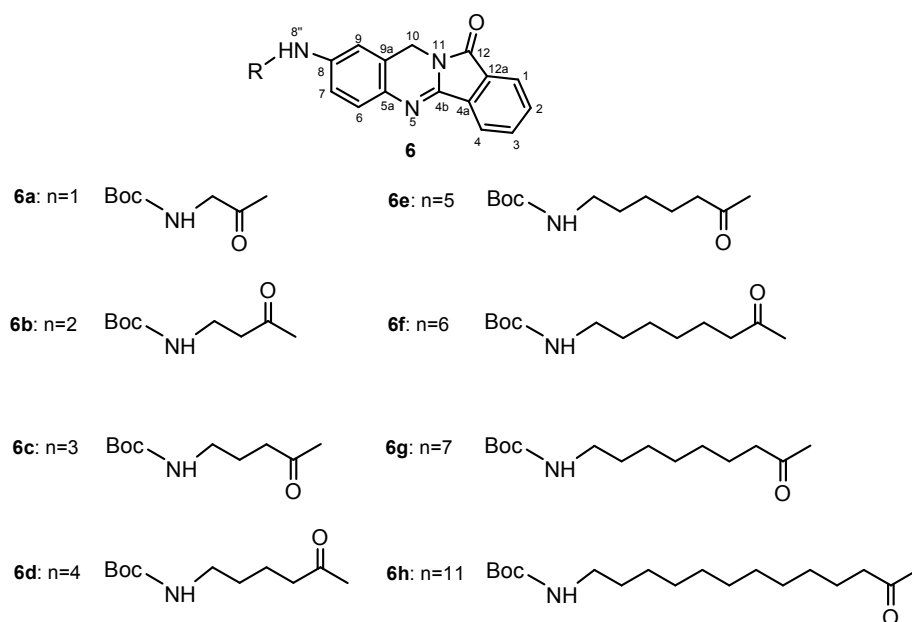

**Fig. 1** The structure of C<sup>8</sup>-substituted batracylin derivatives, **6a–h**.

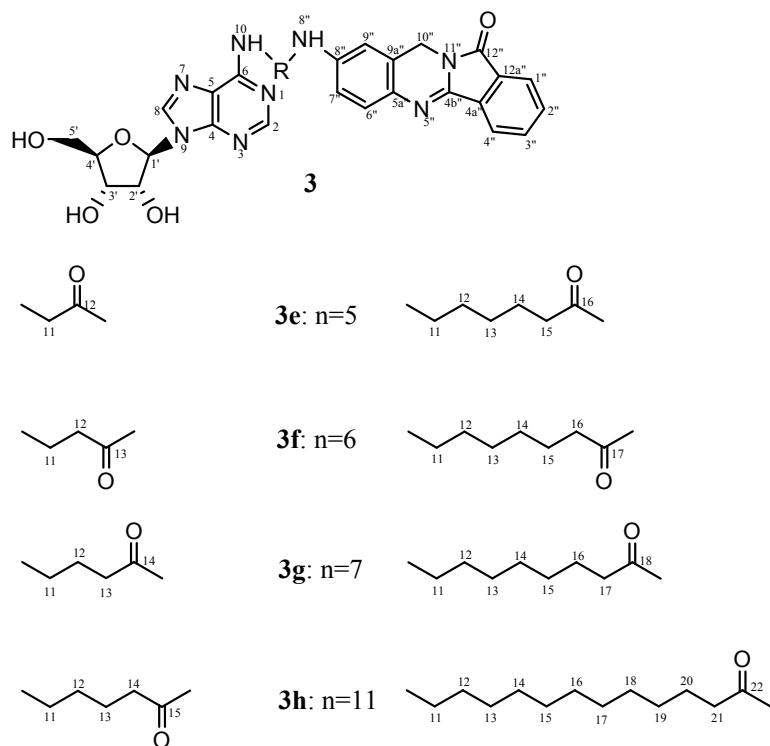

**Fig. 2** The structure of analogues **3a–h**.

**Table 3** Samples concentration.

| Compound no | Concentration [mg mL <sup>-1</sup> ] |
|-------------|--------------------------------------|
| <b>3a</b>   | 8                                    |
| <b>3b</b>   | 8                                    |
| <b>3c</b>   | 10                                   |
| <b>3d</b>   | 17                                   |
| <b>3e</b>   | 21                                   |
| <b>3f</b>   | 20                                   |
| <b>3g</b>   | 21                                   |
| <b>3h</b>   | 21                                   |
| <b>6a</b>   | 21                                   |
| <b>6d</b>   | 21                                   |
| <b>6f</b>   | 18                                   |
| <b>6g</b>   | 21                                   |
| <b>6h</b>   | 17                                   |

**Table 4** ROE contacts for compound **3d** and **3h** in DMSO-*d*<sub>6</sub> at 298 K.

| Proton no                            |           | ROE contacts            |                                   |
|--------------------------------------|-----------|-------------------------|-----------------------------------|
|                                      |           | <b>3d</b>               | <b>3h</b>                         |
| <b>adenosine moiety</b>              |           |                         |                                   |
| 1'                                   |           | 8, 2', 3', 4'           | 8, 2', 3', 4'                     |
| 2'                                   |           | 8, 1', 3', 4', 5a', 5b' | 8, 1', 3', 4', 5a', 5b',<br>2'OH* |
| 3'                                   |           | 8, 1', 2', 4', 5a', 5b' | 8, 1', 2', 4', 5a', 5b'           |
| 4'                                   |           | 1', 2', 3', 5a', 5b'    | 1', 2', 3', 5a', 5b'              |
| 5a'                                  |           | 1', 2', 3', 4', 5b'     | 1', 2', 3', 4', 5b'               |
| 5b'                                  |           | 1', 2', 3', 4', 5a'     | 1', 2', 3', 4', 5a'               |
| 2'OH                                 |           |                         | 2'*                               |
| 3'OH                                 |           |                         |                                   |
| 5'OH                                 |           | 5a', 5b'                | 5a', 5b'                          |
| 2                                    |           |                         |                                   |
| 8                                    |           | 1', 2', 3'              | 1', 2', 3'                        |
| 10-NH                                |           | 11*, 12, 13             | 11*, 12, 13                       |
| <b>linker</b>                        |           |                         |                                   |
| <b>3d</b>                            | <b>3h</b> | 12, 13, 10-NH*          | 12, 13, 10-NH*                    |
| 11                                   | 11        |                         |                                   |
| 12/13                                | 12/20     | 11, 14                  | 11, 21, 10-NH                     |
| 14                                   | 13-19     | 13, 8''-CONH            | 11, 12, 21, 10-NH                 |
|                                      | 21        |                         | 19, 20, 8''-CONH                  |
| <b>batracylin</b>                    |           |                         |                                   |
| 1''                                  |           | 2''*                    | 2''*                              |
| 2''                                  |           | 1''*, 3''*              | 1''*, 3''*                        |
| 3''                                  |           | 4''*, 2''*              | 4''*, 2''*                        |
| 4''                                  |           | 3''*                    | 3''*                              |
| 6''                                  |           | 7''*                    | 7''*                              |
| 7''                                  |           | 6''*, 8''-CONH          | 6''*, 8''-CONH                    |
| 9''                                  |           | 6'', 10'', 8''-CONH     | 6'', 10'', 8''-CONH               |
| 10''                                 |           | 7'', 9''                | 7'', 9''                          |
| 8''-CONH                             |           | 21, 7'', 9''            | 21, 7'', 9''                      |
| <b>*HHT – Hartmann Hahn Transfer</b> |           |                         |                                   |

**Table 5** <sup>13</sup>C NMR (500 MHz) chemical shifts for compound **3d** in DMSO-*d*<sub>6</sub> at 298 K.

| <sup>13</sup> C atom no. | <sup>13</sup> C δ (ppm) | <sup>13</sup> C atom no. | <sup>13</sup> C δ (ppm) |
|--------------------------|-------------------------|--------------------------|-------------------------|
| <b>adenosine moiety</b>  |                         | <b>batracylin</b>        |                         |
| C-1'                     | 88.64                   | C-1''                    | 122.49                  |
| C-2'                     | 74.18                   | C-2''                    | 133.90                  |
| C-3'                     | 71.35                   | C-3''                    | 132.92                  |
| C-4'                     | 86.60                   | C-4''                    | 123.54                  |
| C-5'                     | 62.36                   | C-4a''                   | 134.79                  |
| C-2                      | 153.07                  | C-4b''                   | 148.10                  |
| C-4                      | 148.93                  | C-5a''                   | 139.37                  |

|               |        |         |        |
|---------------|--------|---------|--------|
| C-5           | 120.43 | C-6''   | 128.59 |
| C-6           | 155.34 | C-7''   | 119.41 |
| C-8           | 140.34 | C-8''   | 135.96 |
| <b>linker</b> |        | C-9''   | 118.8  |
| C-11          | 39.70  | C-9a''  | 123.10 |
| C-12          | 29.40  | C-10''  | 41.10  |
| C-13          | 23.30  | C-12''  | 166.87 |
| C-14          | 36.89  | C-12a'' | 130.73 |
| C-15          | 172.07 |         |        |

**Table 6** <sup>1</sup>H-NMR (500 MHz) chemical shifts for compound **3d** in DMSO-*d*<sub>6</sub> at 298 K.

| <i>Proton no.</i>       | <sup>1</sup> H δ (ppm) | <i>J</i> <sub>H,H</sub> (Hz) | <i>ROE contacts</i>     |
|-------------------------|------------------------|------------------------------|-------------------------|
| <b>adenosine moiety</b> |                        |                              |                         |
| 1'                      | 5.86                   | <i>d</i> (5.0Hz)             | 8, 2', 3', 4'           |
| 2'                      | 4.59                   | <i>t</i> (5.0Hz)             | 8, 1', 3', 4', 5a', 5b' |
| 3'                      | 4.14                   | <i>t</i> (5.0Hz)             | 8, 1', 2', 4', 5a', 5b' |
| 4'                      | 3.95                   | <i>dd</i> (5.0Hz, 3.5Hz)     | 1', 2', 3', 5a', 5b'    |
| 5a'                     | 3.65                   | <i>dd</i> (12.0Hz, 3.5Hz)    | 1', 2', 3', 4', 5b'     |
| 5b'                     | 3.55                   | <i>dd</i> (12.0Hz, 3.5Hz)    | 1', 2', 3', 4', 5a'     |
| 2'OH                    | 5.51                   | <i>bs</i>                    |                         |
| 3'OH                    | 5.26                   | <i>bs</i>                    |                         |
| 5'OH                    | 5.43                   | <i>bs</i>                    | 5a', 5b'                |
| 2                       | 8.19                   | <i>bs</i>                    |                         |
| 8                       | 8.34                   | <i>bs</i>                    | 1', 2', 3'              |
| 10-NH                   | 7.93                   | <i>bs</i>                    | 11*, 12, 13             |
| <b>linker</b>           |                        |                              |                         |
| 11                      | 3.49                   | <i>bs</i>                    | 12, 13, 10-NH*          |
| 12/13                   | 1.62                   | <i>m</i>                     | 11, 14                  |
| 14                      | 2.37                   | <i>t</i> (7.0Hz)             | 13, 8''-CONH            |
| <b>batracylin</b>       |                        |                              |                         |
| 1''                     | 7.98                   | <i>d</i> (7.0Hz)             | 2''*                    |
| 2''                     | 7.79                   | <i>t</i> (7.0Hz)             | 1''*, 3''*              |
| 3''                     | 7.74                   | <i>t</i> (7.0Hz)             | 4''*, 2''*              |
| 4''                     | 7.87                   | <i>d</i> (7.0Hz)             | 3''*                    |
| 6''                     | 7.33                   | <i>bd</i> (8.0Hz)            | 7''*                    |
| 7''                     | 7.53                   | <i>bd</i> (8.0Hz)            | 6''*, 8''-CONH          |
| 9''                     | 7.57                   | <i>bs</i>                    | 6'', 10'', 8''-CONH     |
| 10''                    | 4.89                   | <i>s</i>                     | 7'', 9''                |
| 8''-CONH                | 10.15                  | <i>s</i>                     | 21, 7'', 9''            |

**\*HHT – Hartmann Hahn Transfer**

**Table 7**  $^{13}\text{C}$  NMR (500 MHz) chemical shifts for compound **3h** in  $\text{DMSO-}d_6$  at 293 K.

| $^{13}\text{C}$ atom no. | $^{13}\text{C}$ $\delta$ (ppm) | $^{13}\text{C}$ atom no. | $^{13}\text{C}$ $\delta$ (ppm) |
|--------------------------|--------------------------------|--------------------------|--------------------------------|
| <b>adenosine moiety</b>  |                                | <b>batracylin</b>        |                                |
| C-1'                     | 88.63                          | C-1''                    | 122.48                         |
| C-2'                     | 74.17                          | C-2''                    | 133.89                         |
| C-3'                     | 71.34                          | C-3''                    | 132.91                         |
| C-4'                     | 86.59                          | C-4''                    | 123.54                         |
| C-5'                     | 62.36                          | C-4a''                   | 134.78                         |
| C-2                      | 153.07                         | C-4b''                   | 148.07                         |
| C-4                      | 148.84                         | C-5a''                   | 139.42                         |
| C-5                      | 120.39                         | C-6''                    | 128.58                         |
| C-6                      | 155.31                         | C-7''                    | 119.38                         |
| C-8                      | 140.30                         | C-8''                    | 135.91                         |
| <b>linker</b>            |                                | C-9''                    | 118.04                         |
| C-11                     | 39.67                          | C-9a''                   | 123.07                         |
| C-12                     | 29.70                          | C-10''                   | 41.10                          |
| C-13-19                  | 26.0-32.0                      | C-12''                   | 166.87                         |
| C-20                     | 25.80                          | C-12a''                  | 130.73                         |
| C-21                     | 37.09                          |                          |                                |
| C-22                     | 172.19                         |                          |                                |

**Table 8**  $^1\text{H}$  NMR (500 MHz) chemical shifts for compound **3h** in  $\text{DMSO-}d_6$  at 293 K.

| Proton no.              | $^1\text{H}$ $\delta$ (ppm) | $J_{\text{H,H}}$ (Hz)     | ROE contacts                   |
|-------------------------|-----------------------------|---------------------------|--------------------------------|
| <b>adenosine moiety</b> |                             |                           |                                |
| 1'                      | 5.86                        | <i>d</i> (5.0Hz)          | 8, 2', 3', 4'                  |
| 2'                      | 4.58                        | <i>t</i> (5.0Hz)          | 8, 1', 3', 4', 5a', 5b', 2'OH* |
| 3'                      | 4.12                        | <i>t</i> (5.0Hz)          | 8, 1', 2', 4', 5a', 5b'        |
| 4'                      | 3.95                        | <i>dd</i> (5.0Hz, 3.5Hz)  | 1', 2', 3', 5a', 5b'           |
| 5a'                     | 3.65                        | <i>dd</i> (12.0Hz, 3.5Hz) | 1', 2', 3', 4', 5b'            |
| 5b'                     | 3.55                        | <i>dd</i> (12.0Hz, 3.5Hz) | 1', 2', 3', 4', 5a'            |
| 2'OH                    | 5.56                        | <i>bs</i>                 | 2'*                            |
| 3'OH                    | 5.31                        | <i>bs</i>                 |                                |
| 5'OH                    | 5.47                        | <i>bs</i>                 | 5a', 5b'                       |
| 2                       | 8.18                        | <i>bs</i>                 |                                |
| 8                       | 8.33                        | <i>bs</i>                 | 1', 2', 3'                     |
| 10-NH                   | 7.90                        | <i>bs</i>                 | 11*, 12, 13                    |
| <b>linker</b>           |                             |                           |                                |
| 11                      | 3.49                        | <i>bs</i>                 | 12, 13, 10-NH*                 |
| 12/20                   | 1.56                        | <i>m</i>                  | 11, 21, 10-NH                  |
| 13-19                   | 1.25                        | <i>m</i>                  | 11, 12, 21, 10-NH              |
| 21                      | 2.30                        | <i>t</i> (7.0Hz)          | 19, 20, 8''-CONH               |
| <b>batracylin</b>       |                             |                           |                                |
| 1''                     | 7.98                        | <i>d</i> (7.0Hz)          | 2''*                           |
| 2''                     | 7.78                        | <i>t</i> (7.0Hz)          | 1''*, 3''*                     |

|                                       |       |                   |                     |
|---------------------------------------|-------|-------------------|---------------------|
| 3''                                   | 7.73  | <i>t</i> (7.0Hz)  | 4''*, 2''*          |
| 4''                                   | 7.87  | <i>d</i> (7.0Hz)  | 3''*                |
| 6''                                   | 7.33  | <i>bd</i> (8.0Hz) | 7''*                |
| 7''                                   | 7.54  | <i>bd</i> (8.0Hz) | 6''*, 8''-CONH      |
| 9''                                   | 7.58  | <i>bs</i>         | 6'', 10'', 8''-CONH |
| 10''                                  | 4.89  | <i>s</i>          | 7'', 9''            |
| 8''-CONH                              | 10.17 | <i>s</i>          | 21, 7'', 9''        |
| <b>* HHT – Hartmann Hahn Transfer</b> |       |                   |                     |

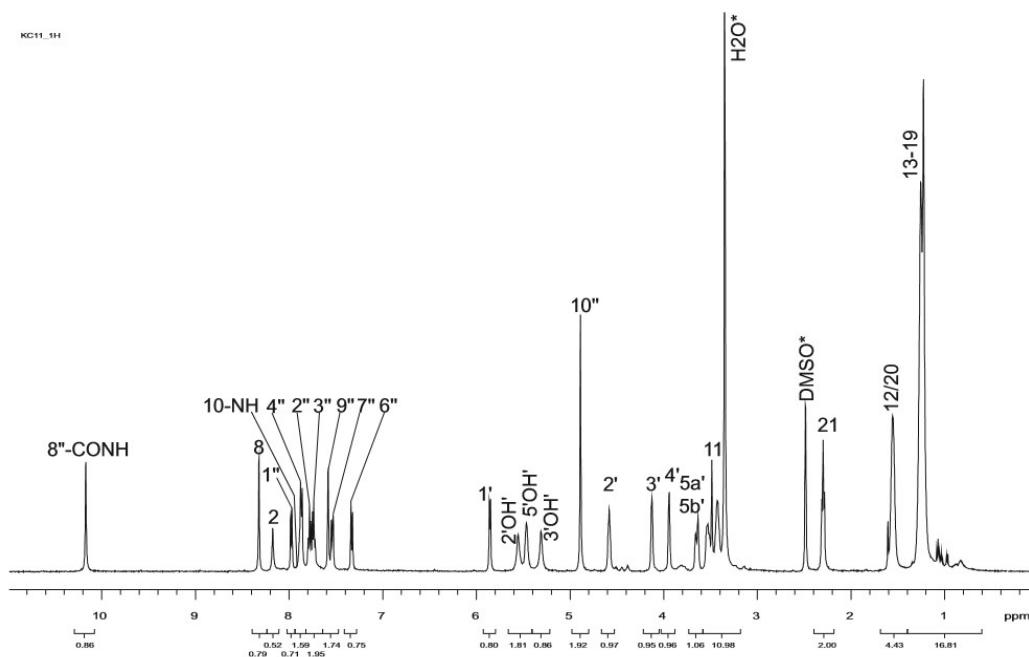

### Biological assays

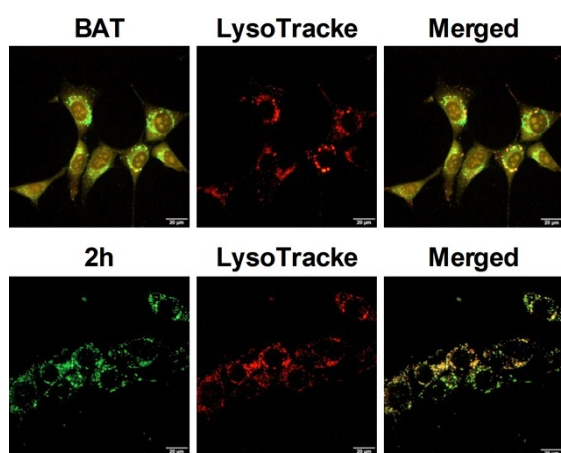

**Fig. 3** Intracellular localization of BAT and its 2h derivative in living A549 cells.

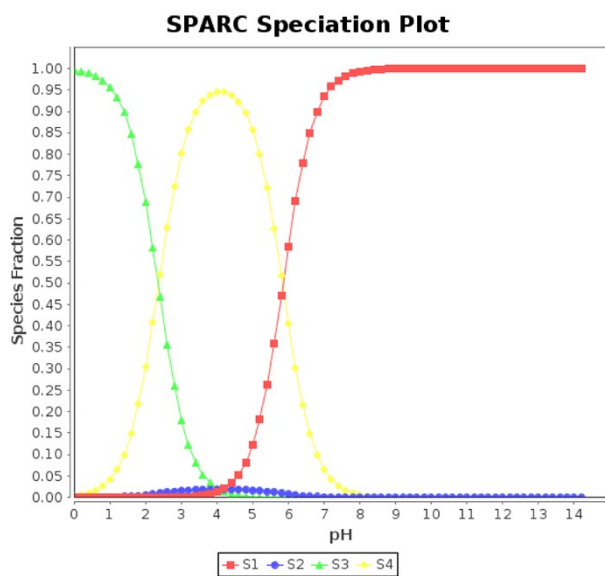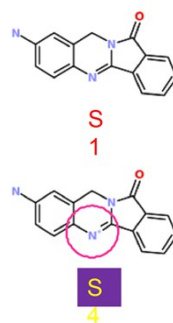

**Fig. 4A** Protonation profile of batracylin

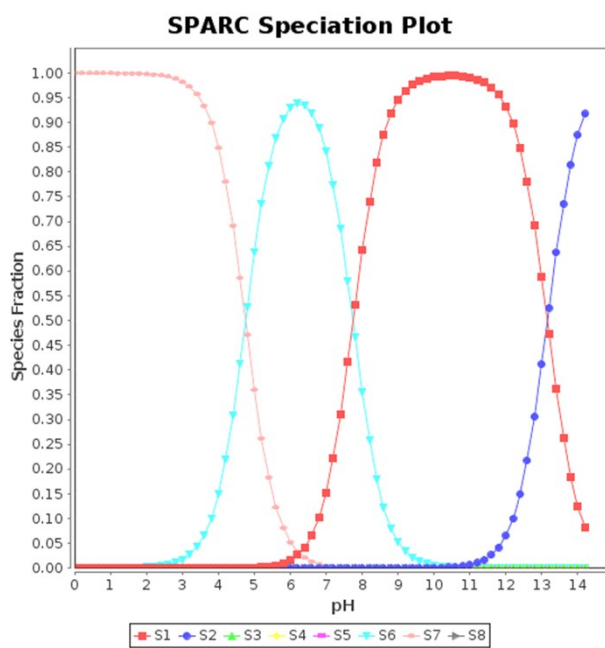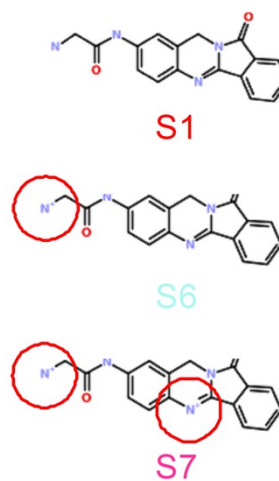

**Fig. 4B** Protonation profile of compound 2a

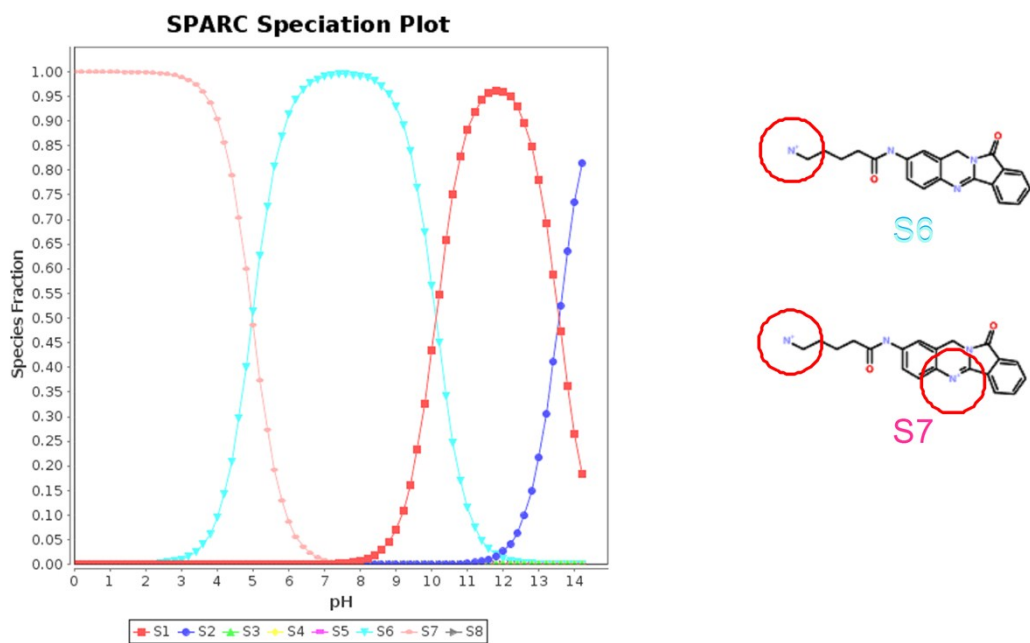

**Fig. 4C** Protonation profile of compound **2d**

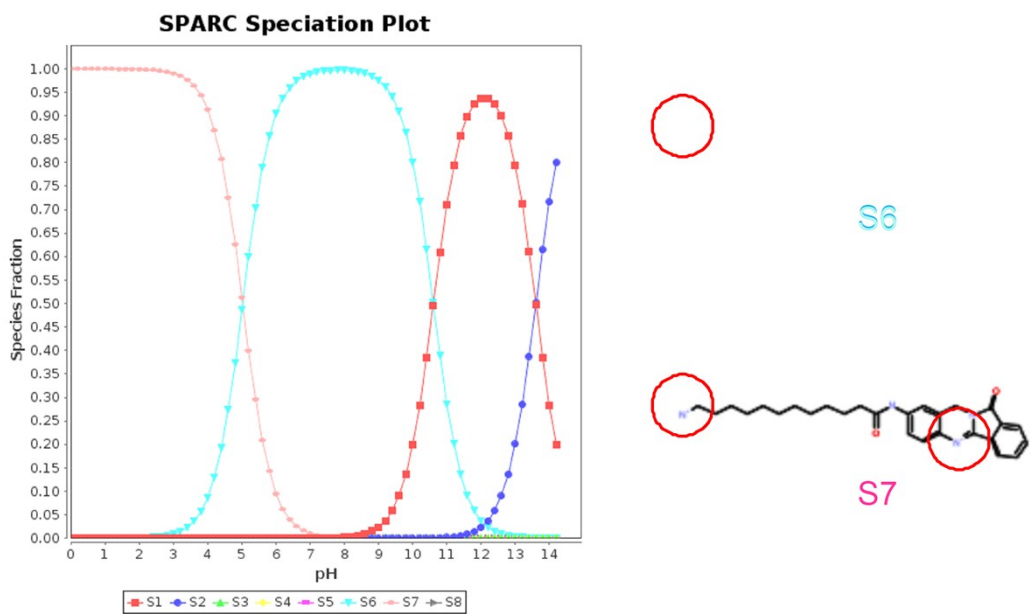

**Fig. 4D** Protonation profile of compound **2h**



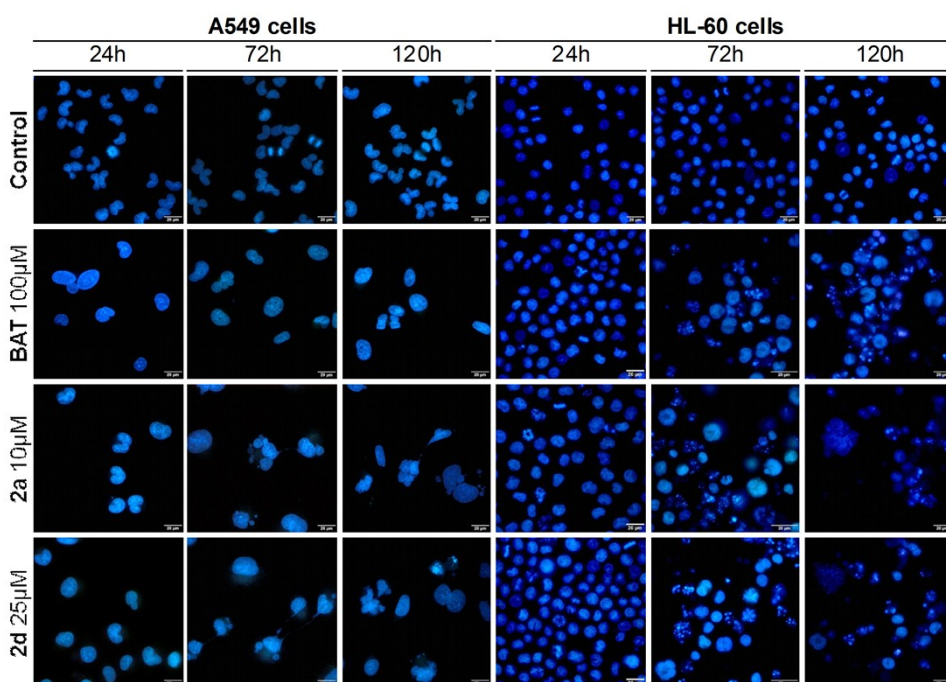

**Fig. 5** Nuclear morphology of cells treated with BAT and its amino acid conjugates for the time indicated. Cells were treated with studied compounds, stained with Hoechst 33342 and analyzed by fluorescence microscopy.

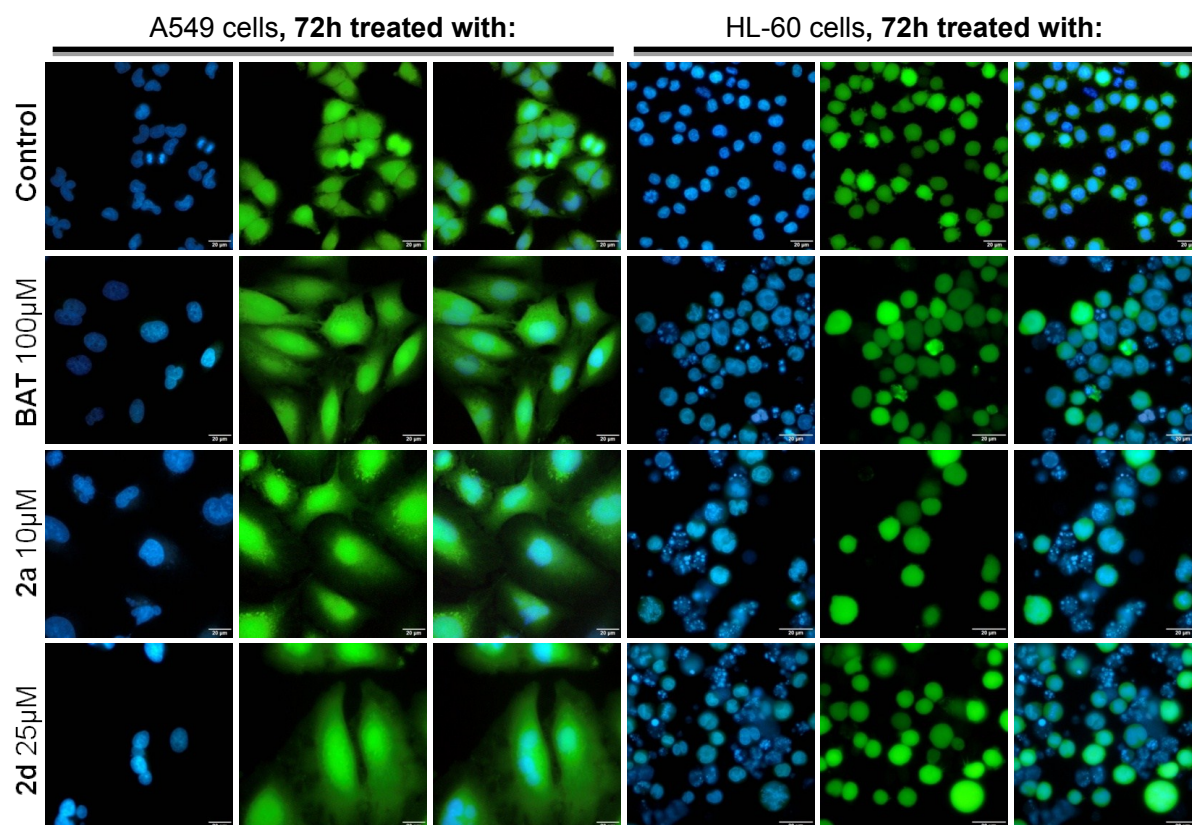

**Fig. 6** Nuclear morphology of A549 and HL-60 cells treated with BAT and its amino acid conjugates. Cells were treated with studied compounds for 72h, stained with Hoechst 33342 (blue), acridine orange (green) and analyzed by fluorescence microscopy.

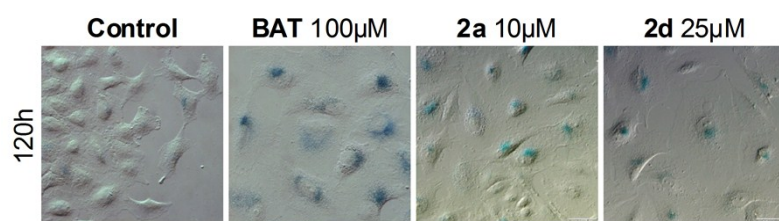

**Fig. 7** Induction of premature cellular senescence in A549 cells treated with studied compounds for 120h. After treatment cells were fixed and stained for SA- $\beta$ -Gal activity as described in Materials and Methods and analyzed by light microscopy.

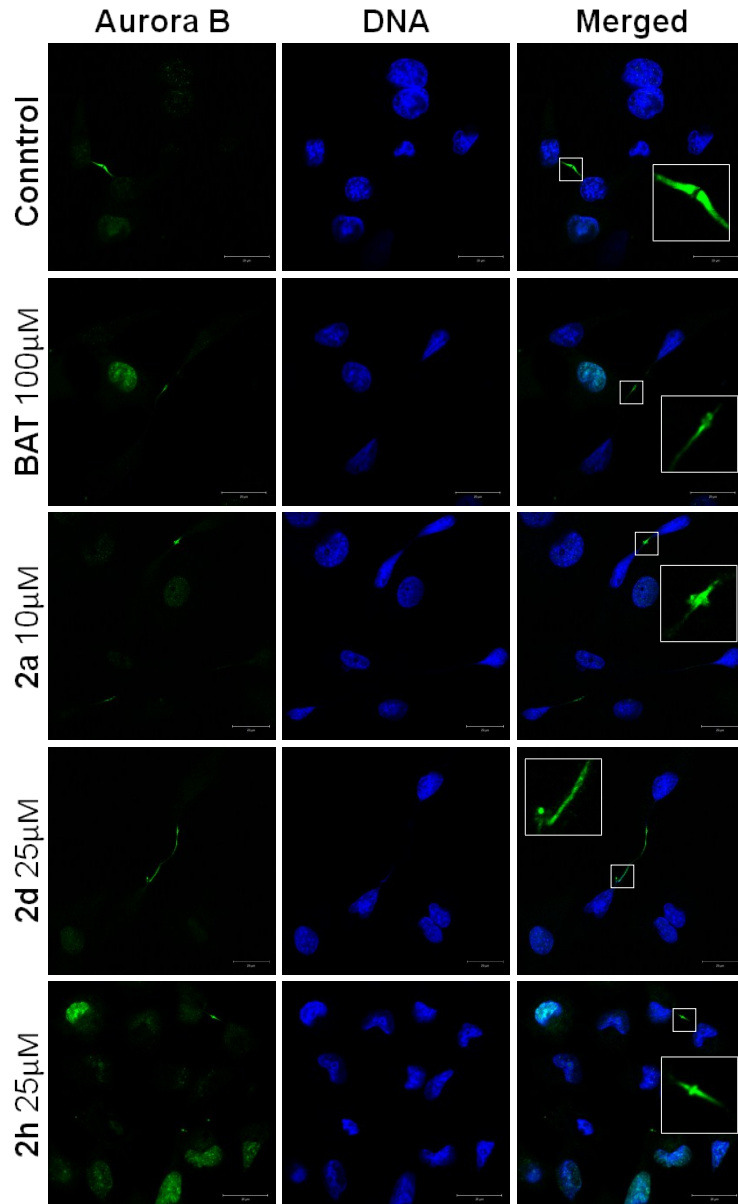

**Fig. 8** Intracellular localization of AuroraB in A549 cells treated with studied compounds for 3h. After treatment cells were fixed, stained with Aurora B specific antibodies (green) as described in Materials and Methods and analyzed by fluorescence microscopy. DNA was counterstained with DAPI (blue). Insert: enlarged image of the mid-body structure containing Aurora B.
